# Supplementary material
Source: MDPI journal article supplement (https://www.mdpi.com/2073-4441/15/6/1026)
Supplement: s1 [file s1]

## Supplementary material

Table S1. Climatological information from Argostoli Station in Cephalonia (1970-2010) (HNMS [47]).

| Climatic Data                          | Argostoli Station – Cephalonia – Data Period: 1970-2010 |       |      |      |      |      |      |      |      |      |       |       |
|----------------------------------------|---------------------------------------------------------|-------|------|------|------|------|------|------|------|------|-------|-------|
|                                        | Jan.                                                    | Feb.  | Mar. | Apr. | May  | Jun. | Jul. | Aug. | Sep. | Oct. | Nov.  | Dec.  |
| Monthly Mean Precipitation Height (mm) | 113.3                                                   | 101.3 | 69.4 | 51.6 | 17.2 | 8.6  | 6.0  | 9.4  | 46.5 | 94.7 | 147.3 | 147.0 |
| Monthly Mean Precipitation Days        | 14.1                                                    | 13.4  | 10.7 | 9.0  | 4.7  | 1.8  | 0.8  | 1.6  | 5.4  | 10.0 | 12.9  | 15.4  |
| Minimum Monthly Temperature (°C)       | 8.5                                                     | 8.3   | 9.3  | 11.3 | 14.6 | 18.3 | 20.8 | 21.4 | 19.0 | 16.1 | 12.7  | 9.8   |
| Maximum Monthly Temperature (°C)       | 14.5                                                    | 14.3  | 16.0 | 18.6 | 23.0 | 26.9 | 29.3 | 29.9 | 26.9 | 23.2 | 19.0  | 15.7  |
| Monthly Mean Temperature (°C)          | 11.4                                                    | 11.4  | 12.9 | 15.6 | 19.7 | 23.7 | 25.9 | 26.3 | 23.4 | 19.8 | 15.9  | 12.8  |
| Monthly Mean Wind Power                | 6.8                                                     | 7.2   | 6.9  | 6.4  | 6.0  | 6.2  | 6.6  | 6.1  | 5.7  | 6.0  | 6.3   | 6.9   |

Table S2. Climatological information from Zakynthos Airport Station in Zakynthos (1982-2010) (HNMS [47]).

| Climatic Data                          | Zakynthos Airport – Zakynthos – Data Period: 1982-2010 |      |      |      |      |      |      |      |      |      |       |       |
|----------------------------------------|--------------------------------------------------------|------|------|------|------|------|------|------|------|------|-------|-------|
|                                        | Jan.                                                   | Feb. | Mar. | Apr. | May  | Jun. | Jul. | Aug. | Sep. | Oct. | Nov.  | Dec.  |
| Monthly Mean Precipitation Height (mm) | 82.1                                                   | 81.1 | 73.3 | 36.2 | 13.8 | 3.7  | 4.1  | 5.9  | 30.8 | 89.0 | 142.0 | 135.0 |
| Monthly Mean Precipitation Days        | 11.6                                                   | 12.3 | 9.2  | 6.9  | 4.0  | 1.3  | 0.6  | 1.1  | 4.3  | 8.0  | 13.0  | 14.8  |
| Minimum Monthly Temperature (°C)       | 6.7                                                    | 6.5  | 7.6  | 9.6  | 13.1 | 16.9 | 19.4 | 19.9 | 17.2 | 14.5 | 11.2  | 8.2   |
| Maximum Monthly Temperature (°C)       | 14.4                                                   | 14.4 | 15.9 | 19.1 | 24.3 | 29.1 | 32.1 | 32.2 | 28.2 | 23.9 | 19.0  | 15.4  |
| Monthly Mean Temperature (°C)          | 10.6                                                   | 10.5 | 11.8 | 14.4 | 18.7 | 23.0 | 25.8 | 26.1 | 22.7 | 19.2 | 15.1  | 11.8  |
